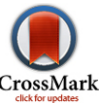

## Correction

# Correction: Transcription Fluctuation Effects on Biochemical Oscillations

The *PLOS ONE* Staff

## Notice of Republication

This article was republished on March 20, 2014, to replace Figures 2-6 and Table 1, which were originally published incorrectly. This republication also resolves the initial correction published on November 8, 2013. The publisher apologizes for these errors. Please download this article again to view the correct version. The originally published, uncorrected article and the republished, corrected article are provided here for reference.

## Supporting Information

**File S1.** Originally published, uncorrected article.

**File S2.** Republished corrected article.

## Reference

1. Nishino R, Sakaue T, Nakanishi H (2013) Transcription Fluctuation Effects on Biochemical Oscillations. *PLoS ONE* 8(4): e60938. doi:10.1371/journal.pone.0060938

**Citation:** The *PLOS ONE* Staff (2014) Correction: Transcription Fluctuation Effects on Biochemical Oscillations. *PLoS ONE* 9(4): e95119. doi:10.1371/journal.pone.0095119

**Published:** April 9, 2014

**Copyright:** © 2014 The *PLOS ONE* Staff. This is an open-access article distributed under the terms of the Creative Commons Attribution License, which permits unrestricted use, distribution, and reproduction in any medium, provided the original author and source are credited.
